# Supplementary material for: Changes in Proteins in Saliva and Serum in Equine Gastric Ulcer Syndrome Using a Proteomic Approach
Source: Animals (Basel). 2022 May 2;12(9):1169. doi: 10.3390/ani12091169 (PMC9103582; doi:10.3390/ani12091169)
Supplement: Supplementary file 1 [file animals-12-01169-s001.zip]

Archive with 8 entries (8 files):
- Supplementary Figures.pdf
- Supplementary Table S1.xls
- Supplementary Table S2.xls
- Supplementary Table S3.xls
- Supplementary Table S4.xls
- Supplementary Table S5.xls
- Supplementary Table S6.xls
- Supplementary Table S7.xls
