# Supplementary material for: Changes in Proteins in Saliva and Serum in Equine Gastric Ulcer Syndrome Using a Proteomic Approach
Source: Animals (Basel). 2022 May 2;12(9):1169. doi: 10.3390/ani12091169 (PMC9103582; doi:10.3390/ani12091169)
Supplement: Supplementary file 1 [file animals-12-01169-s001.zip › Supplementary Table S1.xls]

## Sheet: ClueGO Results
Table S1. Groups of most representative GO terms in the saliva of horses with EGUS compared with controls
ID	Term	Ontology Source	Term PValue	Term PValue Corrected with None	Group PValue	Group PValue Corrected with None	GOLevels	GOGroups	% Associated Genes	Nr. Genes	Cluster	Genes Cluster #1	Genes Cluster #2	%Genes Cluster #1	%Genes Cluster #2	%Genes Cluster #1.adjusted.to.input.list.size	%Genes Cluster #2.adjusted.to.input.list.size	Associated Genes Found
GO:0032970	regulation of actin filament-based process	GO_BiologicalProcess-Custom-GOA-ACAP-ARAP_22.02.2022_00h00	0.00541753	0.00541753	0.00122105	0.00122105	[3, 4]	Group3	71.4286	5	Specific for Cluster #1	[ARHGDIA, DSC2, DSG2, GSN, WDR1]	[]	100	0	100	0	[ARHGDIA, DSC2, DSG2, GSN, WDR1]
GO:0016485	protein processing	GO_BiologicalProcess-Custom-GOA-ACAP-ARAP_22.02.2022_00h00	0.0079728	0.0079728	0.00122105	0.00122105	[5, 6]	Group3	80	4	Specific for Cluster #1	[CPM, FGB, GSN, PGK1]	[]	100	0	100	0	[CPM, FGB, GSN, PGK1]
GO:0086003	cardiac muscle cell contraction	GO_BiologicalProcess-Custom-GOA-ACAP-ARAP_22.02.2022_00h00	0.00949532	0.00949532	0.00122105	0.00122105	[5, 7]	Group3	100	3	Specific for Cluster #1	[DSC2, DSG2, GSN]	[]	100	0	100	0	[DSC2, DSG2, GSN]
GO:0008015	blood circulation	GO_BiologicalProcess-Custom-GOA-ACAP-ARAP_22.02.2022_00h00	0.0202598	0.0202598	0.00122105	0.00122105	[4]	Group3	66.6667	4	Specific for Cluster #1	[DSC2, DSG2, FGB, GSN]	[]	100	0	100	0	[DSC2, DSG2, FGB, GSN]
GO:0051493	regulation of cytoskeleton organization	GO_BiologicalProcess-Custom-GOA-ACAP-ARAP_22.02.2022_00h00	0.0202598	0.0202598	0.00122105	0.00122105	[5, 6]	Group3	66.6667	4	Specific for Cluster #1	[ARHGDIA, GSN, HSPA1A, WDR1]	[]	100	0	100	0	[ARHGDIA, GSN, HSPA1A, WDR1]
GO:0043170	macromolecule metabolic process	GO_BiologicalProcess-Custom-GOA-ACAP-ARAP_22.02.2022_00h00	0.0249797	0.0249797	0.0249797	0.0249797	[3]	Group1	30	18	Specific for Cluster #1	[A2ML1, ALOX15B, CLCA2, CPM, FGB, GPI, GSN, HSPA1A, KLK12, LOC100060505, LOC100061663, NME2, PGK1, SERPINB5, TMPRSS11D, YWHAQ]	[AHSG, DNASE1]	88.8889	11.1111	82.4742	17.5258	[A2ML1, AHSG, ALOX15B, CLCA2, CPM, DNASE1, FGB, GPI, GSN, HSPA1A, KLK12, LOC100060505, LOC100061663, NME2, PGK1, SERPINB5, TMPRSS11D, YWHAQ]
GO:0070161	anchoring junction	GO_CellularComponent-Custom-GOA-ACAP-ARAP_22.02.2022_00h00	0.0393175	0.0393175	0.00122105	0.00122105	[3]	Group3	50	5	Specific for Cluster #1	[ALOX15B, DSC2, DSG2, GSN, WDR1]	[]	100	0	100	0	[ALOX15B, DSC2, DSG2, GSN, WDR1]
GO:0008233	peptidase activity	GO_BiologicalProcess-Custom-GOA-ACAP-ARAP_22.02.2022_00h00	0.0399709	0.0399709	0.0399709	0.0399709	[5, 6]	Group0	37.5	9	Specific for Cluster #1	[A2ML1, CLCA2, CPM, GSN, KLK12, LOC100060505, SERPINB5, TMPRSS11D]	[AHSG]	88.8889	11.1111	82.4742	17.5258	[A2ML1, AHSG, CLCA2, CPM, GSN, KLK12, LOC100060505, SERPINB5, TMPRSS11D]
GO:0050794	regulation of cellular process	GO_BiologicalProcess-Custom-GOA-ACAP-ARAP_22.02.2022_00h00	0.0404612	0.0404612	0.0404612	0.0404612	[2, 3]	Group2	28.3582	19	Specific for Cluster #1	[A2ML1, ALOX15B, ARHGDIA, DSC2, DSG2, FGB, GPI, GSN, HSPA1A, LOC100060505, LYPD3, NME2, PRDX1, QSOX1, SERPINB5, WDR1, YWHAQ]	[AHSG, DNASE1]	89.4737	10.5263	83.3333	16.6667	[A2ML1, AHSG, ALOX15B, ARHGDIA, DNASE1, DSC2, DSG2, FGB, GPI, GSN, HSPA1A, LOC100060505, LYPD3, NME2, PRDX1, QSOX1, SERPINB5, WDR1, YWHAQ]
