# Supplementary material for: Changes in Proteins in Saliva and Serum in Equine Gastric Ulcer Syndrome Using a Proteomic Approach
Source: Animals (Basel). 2022 May 2;12(9):1169. doi: 10.3390/ani12091169 (PMC9103582; doi:10.3390/ani12091169)
Supplement: Supplementary file 1 [file animals-12-01169-s001.zip › Supplementary Table S2.xls]

## Sheet: ClueGO Results
Table S2. Groups of most representative GO terms in the saliva of horses with EGGD compared with controls
ID	Term	Ontology Source	Term PValue	Term PValue Corrected with None	Group PValue	Group PValue Corrected with None	GOLevels	GOGroups	% Associated Genes	Nr. Genes	Cluster	Genes Cluster #1	Genes Cluster #2	%Genes Cluster #1	%Genes Cluster #2	%Genes Cluster #1.adjusted.to.input.list.size	%Genes Cluster #2.adjusted.to.input.list.size	Associated Genes Found
GO:0004252	serine-type endopeptidase activity	GO_BiologicalProcess-Custom-GOA-ACAP-ARAP_22.02.2022_00h00	0.0279563	0.0279563	0.0279563	0.0279563	[7, 8]	Group0	23.0769	3	Specific for Cluster #1	[A2ML1, TMPRSS11A, TMPRSS11D]	[]	100	0	100	0	[A2ML1, TMPRSS11A, TMPRSS11D]
GO:0016021	integral component of membrane	GO_CellularComponent-Custom-GOA-ACAP-ARAP_22.02.2022_00h00	0.0279563	0.0279563	0.0279563	0.0279563	[3, 4]	Group1	23.0769	3	Specific for Cluster #1	[QSOX1, TMPRSS11A, TMPRSS11D]	[]	100	0	100	0	[QSOX1, TMPRSS11A, TMPRSS11D]
