# Supplementary material for: Changes in Proteins in Saliva and Serum in Equine Gastric Ulcer Syndrome Using a Proteomic Approach
Source: Animals (Basel). 2022 May 2;12(9):1169. doi: 10.3390/ani12091169 (PMC9103582; doi:10.3390/ani12091169)
Supplement: Supplementary file 1 [file animals-12-01169-s001.zip › Supplementary Table S3.xls]

## Sheet: ClueGO Results
Table S3. Groups of most representative GO terms in the saliva of horses with ESGD compared with controls
ID	Term	Ontology Source	Term PValue	Term PValue Corrected with None	Group PValue	Group PValue Corrected with None	GOLevels	GOGroups	% Associated Genes	Nr. Genes	Cluster	Genes Cluster #1	Genes Cluster #2	%Genes Cluster #1	%Genes Cluster #2	%Genes Cluster #1.adjusted.to.input.list.size	%Genes Cluster #2.adjusted.to.input.list.size	Associated Genes Found
GO:0006690	icosanoid metabolic process	GO_BiologicalProcess-Custom-GOA-ACAP-ARAP_22.02.2022_00h00	0.0181142	0.0181142	0.031359	0.031359	[6]	Group3	100	3	Specific for Cluster #1	[ALOX15B, ANXA1, FABP5]	[]	100	0	100	0	[ALOX15B, ANXA1, FABP5]
GO:0006636	unsaturated fatty acid biosynthetic process	GO_BiologicalProcess-Custom-GOA-ACAP-ARAP_22.02.2022_00h00	0.0181142	0.0181142	0.031359	0.031359	[6, 7, 8, 9]	Group3	100	3	Specific for Cluster #1	[ALOX15B, ANXA1, FABP5]	[]	100	0	100	0	[ALOX15B, ANXA1, FABP5]
GO:0016485	protein processing	GO_BiologicalProcess-Custom-GOA-ACAP-ARAP_22.02.2022_00h00	0.0182323	0.0182323	0.0182323	0.0182323	[5, 6]	Group0	80	4	Specific for Cluster #1	[CPM, FGB, GSN, PGK1]	[]	100	0	100	0	[CPM, FGB, GSN, PGK1]
GO:0034762	regulation of transmembrane transport	GO_BiologicalProcess-Custom-GOA-ACAP-ARAP_22.02.2022_00h00	0.0182323	0.0182323	0.0182323	0.0182323	[3, 4, 5]	Group2	80	4	Specific for Cluster #1	[CALML5, FABP5, GLRX, WDR1]	[]	100	0	100	0	[CALML5, FABP5, GLRX, WDR1]
GO:0044283	small molecule biosynthetic process	GO_BiologicalProcess-Custom-GOA-ACAP-ARAP_22.02.2022_00h00	0.0400283	0.0400283	0.031359	0.031359	[3]	Group3	54.5455	6	Specific for Cluster #1	[ALOX15B, ANXA1, FABP5, PGK1, TPI1]	[PGD]	83.3333	16.6667	73.1707	26.8293	[ALOX15B, ANXA1, FABP5, PGD, PGK1, TPI1]
GO:0007267	cell-cell signaling	GO_BiologicalProcess-Custom-GOA-ACAP-ARAP_22.02.2022_00h00	0.0440771	0.0440771	0.031359	0.031359	[2, 3]	Group3	66.6667	4	Specific for Cluster #1	[ANXA1, FABP5, FGB, LOC100061663]	[]	100	0	100	0	[ANXA1, FABP5, FGB, LOC100061663]
GO:0005996	monosaccharide metabolic process	GO_BiologicalProcess-Custom-GOA-ACAP-ARAP_22.02.2022_00h00	0.0440771	0.0440771	0.031359	0.031359	[3, 4]	Group3	66.6667	4	Specific for Cluster #1	[FABP5, PGK1, TPI1]	[PGD]	75	25	62.069	37.931	[FABP5, PGD, PGK1, TPI1]
GO:0016491	oxidoreductase activity	GO_MolecularFunction-Custom-GOA-ACAP-ARAP_22.02.2022_00h00	0.044264	0.044264	0.044264	0.044264	[2]	Group1	50	7	Specific for Cluster #1	[ALOX15B, GLRX, LDHA, PGK1, PRDX1, QSOX1]	[PGD]	85.7143	14.2857	76.5957	23.4043	[ALOX15B, GLRX, LDHA, PGD, PGK1, PRDX1, QSOX1]
GO:0019752	carboxylic acid metabolic process	GO_BiologicalProcess-Custom-GOA-ACAP-ARAP_22.02.2022_00h00	0.0459187	0.0459187	0.031359	0.031359	[5]	Group3	47.0588	8	Specific for Cluster #1	[ALOX15B, ANXA1, ARG1, FABP5, LDHA, PGK1, TPI1]	[PGD]	87.5	12.5	79.2453	20.7547	[ALOX15B, ANXA1, ARG1, FABP5, LDHA, PGD, PGK1, TPI1]
