# Supplementary material for: Changes in Proteins in Saliva and Serum in Equine Gastric Ulcer Syndrome Using a Proteomic Approach
Source: Animals (Basel). 2022 May 2;12(9):1169. doi: 10.3390/ani12091169 (PMC9103582; doi:10.3390/ani12091169)
Supplement: Supplementary file 1 [file animals-12-01169-s001.zip › Supplementary Table S4.xls]

## Sheet: ClueGO Results
Table S4. Groups of most representative GO terms in the saliva of horses with ESGD compared with EGGD
ID	Term	Ontology Source	Term PValue	Term PValue Corrected with None	Group PValue	Group PValue Corrected with None	GOLevels	GOGroups	% Associated Genes	Nr. Genes	Cluster	Genes Cluster #1	Genes Cluster #2	%Genes Cluster #1	%Genes Cluster #2	%Genes Cluster #1.adjusted.to.input.list.size	%Genes Cluster #2.adjusted.to.input.list.size	Associated Genes Found
GO:0002460	adaptive immune response based on somatic recombination of immune receptors built from immunoglobulin superfamily domains	GO_BiologicalProcess-Custom-GOA-ACAP-ARAP_22.02.2022_00h00	0.00730188	0.00730188	0.00713165	0.00713165	[4]	Group3	60	3	Specific for Cluster #2	[]	[ANXA1, ARG1, LOC100060505]	0	100	0	100	[ANXA1, ARG1, LOC100060505]
GO:0042110	T cell activation	GO_BiologicalProcess-Custom-GOA-ACAP-ARAP_22.02.2022_00h00	0.00730188	0.00730188	0.00713165	0.00713165	[4, 5]	Group3	60	3	Specific for Cluster #2	[]	[ANXA1, ARG1, GSN]	0	100	0	100	[ANXA1, ARG1, GSN]
GO:0050678	regulation of epithelial cell proliferation	GO_BiologicalProcess-Custom-GOA-ACAP-ARAP_22.02.2022_00h00	0.013742	0.013742	0.0145058	0.0145058	[4, 5]	Group2	50	3	Specific for Cluster #2	[]	[KRT8, NME2, SERPINB5]	0	100	0	100	[KRT8, NME2, SERPINB5]
GO:0042127	regulation of cell population proliferation	GO_BiologicalProcess-Custom-GOA-ACAP-ARAP_22.02.2022_00h00	0.0145058	0.0145058	0.0145058	0.0145058	[3, 4]	Group2	29.4118	5	Specific for Cluster #2	[]	[ANXA1, ARG1, KRT8, NME2, SERPINB5]	0	100	0	100	[ANXA1, ARG1, KRT8, NME2, SERPINB5]
GO:0045087	innate immune response	GO_BiologicalProcess-Custom-GOA-ACAP-ARAP_22.02.2022_00h00	0.019954	0.019954	0.00713165	0.00713165	[3, 4, 5, 6]	Group3	33.3333	4	Specific for Cluster #2	[]	[ANXA1, ARG1, GSN, LOC100060505]	0	100	0	100	[ANXA1, ARG1, GSN, LOC100060505]
GO:0090407	organophosphate biosynthetic process	GO_BiologicalProcess-Custom-GOA-ACAP-ARAP_22.02.2022_00h00	0.022626	0.022626	0.022626	0.022626	[4, 5]	Group1	42.8571	3	Specific for Cluster #2	[]	[ALDOA, FABP5, NME2]	0	100	0	100	[ALDOA, FABP5, NME2]
GO:0005856	cytoskeleton	GO_CellularComponent-Custom-GOA-ACAP-ARAP_22.02.2022_00h00	0.0243106	0.0243106	0.00713165	0.00713165	[5]	Group3	26.3158	5	Specific for Cluster #2	[]	[ALDOA, ANXA1, GSN, KRT15, KRT8]	0	100	0	100	[ALDOA, ANXA1, GSN, KRT15, KRT8]
GO:0060429	epithelium development	GO_BiologicalProcess-Custom-GOA-ACAP-ARAP_22.02.2022_00h00	0.0459219	0.0459219	0.0459219	0.0459219	[4]	Group0	26.6667	4	Specific for Cluster #2	[]	[ANXA1, KRT15, KRT8, SERPINB5]	0	100	0	100	[ANXA1, KRT15, KRT8, SERPINB5]
GO:0015629	actin cytoskeleton	GO_CellularComponent-Custom-GOA-ACAP-ARAP_22.02.2022_00h00	0.048047	0.048047	0.00713165	0.00713165	[6]	Group3	33.3333	3	Specific for Cluster #2	[]	[ALDOA, ANXA1, GSN]	0	100	0	100	[ALDOA, ANXA1, GSN]
