# Supplementary material for: Changes in Proteins in Saliva and Serum in Equine Gastric Ulcer Syndrome Using a Proteomic Approach
Source: Animals (Basel). 2022 May 2;12(9):1169. doi: 10.3390/ani12091169 (PMC9103582; doi:10.3390/ani12091169)
Supplement: Supplementary file 1 [file animals-12-01169-s001.zip › Supplementary Table S5.xls]

## Sheet: ClueGO Results
Table S5. Groups of most representative GO terms in the serum of horses with EGGD compared with controls
ID	Term	Ontology Source	Term PValue	Term PValue Corrected with None	Group PValue	Group PValue Corrected with None	GOLevels	GOGroups	% Associated Genes	Nr. Genes	Cluster	Genes Cluster #1	Genes Cluster #2	%Genes Cluster #1	%Genes Cluster #2	%Genes Cluster #1.adjusted.to.input.list.size	%Genes Cluster #2.adjusted.to.input.list.size	Associated Genes Found
GO:0002250	adaptive immune response	GO_BiologicalProcess-Custom-GOA-ACAP-ARAP_22.02.2022_00h00	0.00193106	0.00193106	0.00466068	0.00466068	[3]	Group0	45.4545	5	None Specific Cluster	[C1QB, C1R, C8B]	[C2, FGA]	60	40	56.7568	43.2432	[C1QB, C1R, C2, C8B, FGA]
KEGG:05171	Coronavirus disease	KEGG_06.03.2022	0.00492537	0.00492537	0.00466068	0.00466068	[-1]	Group0	38.4615	5	None Specific Cluster	[C1QB, C1R, C8B]	[C2, FGA]	60	40	56.7568	43.2432	[C1QB, C1R, C2, C8B, FGA]
GO:0006958	complement activation, classical pathway	GO_BiologicalProcess-Custom-GOA-ACAP-ARAP_22.02.2022_00h00	0.00833168	0.00833168	0.00466068	0.00466068	[4, 5, 6, 7, 8]	Group0	44.4444	4	Specific for Cluster #1	[C1QB, C1R, C8B]	[C2]	75	25	72.4138	27.5862	[C1QB, C1R, C2, C8B]
KEGG:05322	Systemic lupus erythematosus	KEGG_06.03.2022	0.0131529	0.0131529	0.00466068	0.00466068	[-1]	Group0	40	4	Specific for Cluster #1	[C1QB, C1R, C8B]	[C2]	75	25	72.4138	27.5862	[C1QB, C1R, C2, C8B]
GO:0006959	humoral immune response	GO_BiologicalProcess-Custom-GOA-ACAP-ARAP_22.02.2022_00h00	0.0197052	0.0197052	0.00466068	0.00466068	[3]	Group0	29.4118	5	None Specific Cluster	[C1QB, C1R, C8B]	[C2, LOC100146633]	60	40	56.7568	43.2432	[C1QB, C1R, C2, C8B, LOC100146633]
