# Supplementary material for: Changes in Proteins in Saliva and Serum in Equine Gastric Ulcer Syndrome Using a Proteomic Approach
Source: Animals (Basel). 2022 May 2;12(9):1169. doi: 10.3390/ani12091169 (PMC9103582; doi:10.3390/ani12091169)
Supplement: Supplementary file 1 [file animals-12-01169-s001.zip › Supplementary Table S6.xls]

## Sheet: ClueGO Results
Table S6. Groups of most representative GO terms in the serum of horses with ESGD compared with controls
ID	Term	Ontology Source	Term PValue	Term PValue Corrected with None	Group PValue	Group PValue Corrected with None	GOLevels	GOGroups	% Associated Genes	Nr. Genes	Cluster	Genes Cluster #1	Genes Cluster #2	%Genes Cluster #1	%Genes Cluster #2	%Genes Cluster #1.adjusted.to.input.list.size	%Genes Cluster #2.adjusted.to.input.list.size	Associated Genes Found
GO:0004867	serine-type endopeptidase inhibitor activity	GO_BiologicalProcess-Custom-GOA-ACAP-ARAP_22.02.2022_00h00	0.00454883	0.00454883	0.00454883	0.00454883	[8, 9, 10, 11, 12]	Group0	33.3333	5	None Specific Cluster	[HRG, SERPIND1]	[SERPINA6, SERPING1, SPI2]	40	60	41.791	58.209	[HRG, SERPINA6, SERPIND1, SERPING1, SPI2]
GO:0044092	negative regulation of molecular function	GO_BiologicalProcess-Custom-GOA-ACAP-ARAP_22.02.2022_00h00	0.00835118	0.00835118	0.0621891	0.0621891	[3]	Group1	24	6	Specific for Cluster #2	[HRG, SERPIND1]	[ACTB, SERPINA6, SERPING1, SPI2]	33.3333	66.6667	35	65	[ACTB, HRG, SERPINA6, SERPIND1, SERPING1, SPI2]
GO:0044267	cellular protein metabolic process	GO_BiologicalProcess-Custom-GOA-ACAP-ARAP_22.02.2022_00h00	0.0308135	0.0308135	0.0621891	0.0621891	[4, 5]	Group1	19.3548	6	Specific for Cluster #2	[HRG, SERPIND1]	[ACTB, SERPINA6, SERPING1, SPI2]	33.3333	66.6667	35	65	[ACTB, HRG, SERPINA6, SERPIND1, SERPING1, SPI2]
GO:0051171	regulation of nitrogen compound metabolic process	GO_BiologicalProcess-Custom-GOA-ACAP-ARAP_22.02.2022_00h00	0.0371231	0.0371231	0.0621891	0.0621891	[3, 4]	Group1	18.75	6	Specific for Cluster #2	[HRG, SERPIND1]	[ACTB, SERPINA6, SERPING1, SPI2]	33.3333	66.6667	35	65	[ACTB, HRG, SERPINA6, SERPIND1, SERPING1, SPI2]
GO:0031323	regulation of cellular metabolic process	GO_BiologicalProcess-Custom-GOA-ACAP-ARAP_22.02.2022_00h00	0.0443934	0.0443934	0.0621891	0.0621891	[3, 4]	Group1	18.1818	6	Specific for Cluster #2	[HRG, SERPIND1]	[ACTB, SERPINA6, SERPING1, SPI2]	33.3333	66.6667	35	65	[ACTB, HRG, SERPINA6, SERPIND1, SERPING1, SPI2]
GO:0060255	regulation of macromolecule metabolic process	GO_BiologicalProcess-Custom-GOA-ACAP-ARAP_22.02.2022_00h00	0.0443934	0.0443934	0.0621891	0.0621891	[3, 4]	Group1	18.1818	6	Specific for Cluster #2	[HRG, SERPIND1]	[ACTB, SERPINA6, SERPING1, SPI2]	33.3333	66.6667	35	65	[ACTB, HRG, SERPINA6, SERPIND1, SERPING1, SPI2]
