# Supplementary material for: Changes in Proteins in Saliva and Serum in Equine Gastric Ulcer Syndrome Using a Proteomic Approach
Source: Animals (Basel). 2022 May 2;12(9):1169. doi: 10.3390/ani12091169 (PMC9103582; doi:10.3390/ani12091169)
Supplement: Supplementary file 1 [file animals-12-01169-s001.zip › Supplementary Table S7.xls]

## Sheet: ClueGO Results
Table S7. Groups of most representative GO terms in the serum of horses with ESGD compared with EGGD
ID	Term	Ontology Source	Term PValue	Term PValue Corrected with None	Group PValue	Group PValue Corrected with None	GOLevels	GOGroups	% Associated Genes	Nr. Genes	Cluster	Genes Cluster #1	Genes Cluster #2	%Genes Cluster #1	%Genes Cluster #2	%Genes Cluster #1.adjusted.to.input.list.size	%Genes Cluster #2.adjusted.to.input.list.size	Associated Genes Found
GO:0098794	postsynapse	GO_CellularComponent-Custom-GOA-ACAP-ARAP_22.02.2022_00h00	0.00658472	0.00658472			[2, 4]	None	100	2	Specific for Cluster #2	[]	[ACTB, C1QB]	0	100	0	100	[ACTB, C1QB]
GO:0050808	synapse organization	GO_BiologicalProcess-Custom-GOA-ACAP-ARAP_22.02.2022_00h00	0.018956	0.018956			[5]	None	66.6667	2	Specific for Cluster #2	[]	[ACTB, C1QB]	0	100	0	100	[ACTB, C1QB]
KEGG:04145	Phagosome	KEGG_06.03.2022	0.036371	0.036371			[-1]	None	50	2	Specific for Cluster #2	[]	[ACTB, C1R]	0	100	0	100	[ACTB, C1R]
